# Supplementary material for: Global miRNA, lncRNA, and mRNA Transcriptome Profiling of Endometrial Epithelial Cells Reveals Genes Related to Porcine Reproductive Failure Caused by Porcine Reproductive and Respiratory Syndrome Virus
Source: Front Immunol. 2019 Jun 4;10:1221. doi: 10.3389/fimmu.2019.01221 (PMC6559286; doi:10.3389/fimmu.2019.01221)
Supplement: Supplementary file 2 [file Table_2.csv]

Supplemental Table 2: DemiRNAs and its target genes
miRNA	Target
ssc-miR-1277	XM_003125368.6
ssc-miR-1285	NM_001001909.1
ssc-miR-1285	NM_001025226.1
ssc-miR-1285	NM_001031778.1
ssc-miR-1285	NM_001044536.1
ssc-miR-1285	NM_001044601.1
ssc-miR-1285	NM_001078676.1
ssc-miR-1285	NM_001078678.1
ssc-miR-1285	NM_001112693.1
ssc-miR-1285	NM_001129959.1
ssc-miR-1285	NM_001130531.1
ssc-miR-1285	NM_001144121.1
ssc-miR-1285	NM_001159659.1
ssc-miR-1285	NM_001164007.1
ssc-miR-1285	NM_001190275.1
ssc-miR-1285	NM_001204769.1
ssc-miR-1285	NM_001243562.1
ssc-miR-1285	NM_001244967.1
ssc-miR-1285	NM_001271715.1
ssc-miR-1285	NM_001287419.1
ssc-miR-1285	NM_001308410.2
ssc-miR-1285	NM_213962.2
ssc-miR-1285	NM_213999.2
ssc-miR-1285	NM_214017.1
ssc-miR-1285	NM_214291.1
ssc-miR-1285	NM_214322.1
ssc-miR-1285	NM_214372.1
ssc-miR-1285	NM_214448.2
ssc-miR-1285	NM_214454.1
ssc-miR-1285	XM_001924949.4
ssc-miR-1285	XM_001925270.6
ssc-miR-1285	XM_001926306.7
ssc-miR-1285	XM_001927611.5
ssc-miR-1285	XM_001927812.5
ssc-miR-1285	XM_003124308.4
ssc-miR-1285	XM_003124436.4
ssc-miR-1285	XM_003125531.4
ssc-miR-1285	XM_003126023.6
ssc-miR-1285	XM_003127921.6
ssc-miR-1285	XM_003128394.4
ssc-miR-1285	XM_003129916.5
ssc-miR-1285	XM_003131876.4
ssc-miR-1285	XM_003132613.5
ssc-miR-1285	XM_003134679.4
ssc-miR-1285	XM_003135124.6
ssc-miR-1285	XM_003135517.5
ssc-miR-1285	XM_003354289.4
ssc-miR-1285	XM_003354477.4
ssc-miR-1285	XM_003354536.4
ssc-miR-1285	XM_003357379.4
ssc-miR-1285	XM_003358650.5
ssc-miR-1285	XM_003359881.4
ssc-miR-129a-5p	NM_001246269.1
ssc-miR-129a-5p	XM_001924940.6
ssc-miR-129a-5p	XM_001929104.6
ssc-miR-129a-5p	XM_003127917.5
ssc-miR-129a-5p	XM_003134403.5
ssc-miR-129a-5p	XM_005652340.3
ssc-miR-129a-5p	XM_005652341.3
ssc-miR-129a-5p	XM_005652343.3
ssc-miR-129a-5p	XM_005655388.3
ssc-miR-129a-5p	XM_005663366.3
ssc-miR-129a-5p	XM_005663373.1
ssc-miR-129a-5p	XM_005663374.3
ssc-miR-129a-5p	XM_005665367.3
ssc-miR-129a-5p	XM_005671816.3
ssc-miR-129a-5p	XM_005672763.3
ssc-miR-129a-5p	XM_013980472.2
ssc-miR-129a-5p	XM_013980473.2
ssc-miR-129a-5p	XM_013994347.2
ssc-miR-129a-5p	XM_013995363.2
ssc-miR-129a-5p	XM_013996904.2
ssc-miR-129a-5p	XM_013997239.2
ssc-miR-129a-5p	XM_013997789.2
ssc-miR-129a-5p	XM_013998101.2
ssc-miR-129a-5p	XM_013998405.2
ssc-miR-129a-5p	XM_013999331.2
ssc-miR-129a-5p	XM_013999334.2
ssc-miR-129a-5p	XM_013999338.2
ssc-miR-129a-5p	XM_021065332.1
ssc-miR-129a-5p	XM_021065333.1
ssc-miR-129a-5p	XM_021065334.1
ssc-miR-129a-5p	XM_021065335.1
ssc-miR-129a-5p	XM_021065336.1
ssc-miR-129a-5p	XM_021065337.1
ssc-miR-129a-5p	XM_021065338.1
ssc-miR-129a-5p	XM_021065339.1
ssc-miR-129a-5p	XM_021065340.1
ssc-miR-129a-5p	XM_021065341.1
ssc-miR-129a-5p	XM_021065342.1
ssc-miR-129a-5p	XM_021065343.1
ssc-miR-129a-5p	XM_021065344.1
ssc-miR-129a-5p	XM_021065345.1
ssc-miR-129a-5p	XM_021065346.1
ssc-miR-129a-5p	XM_021065573.1
ssc-miR-129a-5p	XM_021074862.1
ssc-miR-129a-5p	XM_021077224.1
ssc-miR-129a-5p	XM_021077809.1
ssc-miR-129a-5p	XM_021078487.1
ssc-miR-129a-5p	XM_021085318.1
ssc-miR-129a-5p	XM_021085322.1
ssc-miR-129a-5p	XM_021085335.1
ssc-miR-129a-5p	XM_021085337.1
ssc-miR-129a-5p	XM_021085341.1
ssc-miR-129a-5p	XM_021085342.1
ssc-miR-129a-5p	XM_021085710.1
ssc-miR-129a-5p	XM_021085711.1
ssc-miR-129a-5p	XM_021085712.1
ssc-miR-129a-5p	XM_021090859.1
ssc-miR-129a-5p	XM_021078037.1
ssc-miR-129b	NM_001246269.1
ssc-miR-129b	XM_001924940.6
ssc-miR-129b	XM_001929104.6
ssc-miR-129b	XM_003127917.5
ssc-miR-129b	XM_003134403.5
ssc-miR-129b	XM_005652340.3
ssc-miR-129b	XM_005652341.3
ssc-miR-129b	XM_005652343.3
ssc-miR-129b	XM_005655388.3
ssc-miR-129b	XM_005663366.3
ssc-miR-129b	XM_005663373.1
ssc-miR-129b	XM_005663374.3
ssc-miR-129b	XM_005665367.3
ssc-miR-129b	XM_005671816.3
ssc-miR-129b	XM_005672763.3
ssc-miR-129b	XM_013980472.2
ssc-miR-129b	XM_013980473.2
ssc-miR-129b	XM_013994347.2
ssc-miR-129b	XM_013995363.2
ssc-miR-129b	XM_013996904.2
ssc-miR-129b	XM_013997239.2
ssc-miR-129b	XM_013997789.2
ssc-miR-129b	XM_013998101.2
ssc-miR-129b	XM_013998405.2
ssc-miR-129b	XM_013999331.2
ssc-miR-129b	XM_013999334.2
ssc-miR-129b	XM_013999338.2
ssc-miR-129b	XM_021065332.1
ssc-miR-129b	XM_021065333.1
ssc-miR-129b	XM_021065334.1
ssc-miR-129b	XM_021065335.1
ssc-miR-129b	XM_021065336.1
ssc-miR-129b	XM_021065337.1
ssc-miR-129b	XM_021065338.1
ssc-miR-129b	XM_021065339.1
ssc-miR-129b	XM_021065340.1
ssc-miR-129b	XM_021065341.1
ssc-miR-129b	XM_021065342.1
ssc-miR-129b	XM_021065343.1
ssc-miR-129b	XM_021065344.1
ssc-miR-129b	XM_021065345.1
ssc-miR-129b	XM_021065346.1
ssc-miR-129b	XM_021065573.1
ssc-miR-129b	XM_021074862.1
ssc-miR-129b	XM_021077224.1
ssc-miR-129b	XM_021077809.1
ssc-miR-129b	XM_021078487.1
ssc-miR-129b	XM_021085318.1
ssc-miR-129b	XM_021085322.1
ssc-miR-129b	XM_021085335.1
ssc-miR-129b	XM_021085337.1
ssc-miR-129b	XM_021085341.1
ssc-miR-129b	XM_021085342.1
ssc-miR-129b	XM_021085710.1
ssc-miR-129b	XM_021085711.1
ssc-miR-129b	XM_021085712.1
ssc-miR-129b	XM_021090859.1
ssc-miR-129b	XM_021078037.1
ssc-miR-151-3p	NM_001001268.1
ssc-miR-151-3p	NM_213782.1
ssc-miR-151-3p	XM_003135200.4
ssc-miR-151-3p	XM_003357106.4
ssc-miR-151-3p	XM_003359865.4
ssc-miR-151-3p	XM_003482550.4
ssc-miR-151-3p	XM_005653332.3
ssc-miR-151-3p	XM_005661646.3
ssc-miR-151-3p	XM_005664345.3
ssc-miR-151-3p	XM_005672653.2
ssc-miR-151-3p	XM_013982284.2
ssc-miR-151-3p	XM_013986002.2
ssc-miR-151-3p	XM_013990937.2
ssc-miR-151-3p	XM_013998177.2
ssc-miR-151-3p	XM_021062552.1
ssc-miR-151-3p	XM_021065607.1
ssc-miR-151-3p	XM_021067731.1
ssc-miR-151-3p	XM_021067734.1
ssc-miR-151-3p	XM_021067735.1
ssc-miR-151-3p	XM_021067736.1
ssc-miR-151-3p	XM_021069811.1
ssc-miR-151-3p	XM_021076583.1
ssc-miR-151-3p	XM_021076586.1
ssc-miR-151-3p	XM_021076587.1
ssc-miR-151-3p	XM_021077306.1
ssc-miR-151-3p	XM_021078058.1
ssc-miR-151-3p	XM_021078059.1
ssc-miR-151-3p	XM_021078060.1
ssc-miR-151-3p	XM_021078061.1
ssc-miR-151-3p	XM_021079014.1
ssc-miR-151-3p	XM_021079390.1
ssc-miR-151-3p	XM_021079786.1
ssc-miR-151-3p	XM_021080845.1
ssc-miR-151-3p	XM_021080860.1
ssc-miR-151-3p	XM_021087985.1
ssc-miR-151-3p	XM_021087986.1
ssc-miR-151-3p	XM_021087987.1
ssc-miR-151-3p	XM_021089573.1
ssc-miR-151-3p	XM_021090554.1
ssc-miR-151-3p	XM_021090555.1
ssc-miR-181d-5p	NM_001044613.1
ssc-miR-181d-5p	NM_001101030.1
ssc-miR-181d-5p	NM_001256594.1
ssc-miR-181d-5p	NM_001271715.1
ssc-miR-181d-5p	NM_214078.1
ssc-miR-181d-5p	NM_214133.1
ssc-miR-181d-5p	XM_003126708.4
ssc-miR-181d-5p	XM_003127844.5
ssc-miR-181d-5p	XM_003128044.6
ssc-miR-181d-5p	XM_003133904.5
ssc-miR-181d-5p	XM_003133914.5
ssc-miR-181d-5p	XM_003358948.4
ssc-miR-181d-5p	XM_003359263.5
ssc-miR-181d-5p	XM_003480745.1
ssc-miR-181d-5p	XM_003482550.4
ssc-miR-181d-5p	XM_005653058.3
ssc-miR-181d-5p	XM_005653321.3
ssc-miR-181d-5p	XM_005655647.3
ssc-miR-181d-5p	XM_005656313.3
ssc-miR-181d-5p	XM_005659939.3
ssc-miR-181d-5p	XM_005661886.3
ssc-miR-181d-5p	XM_005664253.3
ssc-miR-181d-5p	XM_005664254.3
ssc-miR-181d-5p	XM_005665474.3
ssc-miR-181d-5p	XM_005665475.3
ssc-miR-181d-5p	XM_005665476.3
ssc-miR-181d-5p	XM_005665477.3
ssc-miR-181d-5p	XM_005665672.3
ssc-miR-181d-5p	XM_005665673.3
ssc-miR-181d-5p	XM_005667396.3
ssc-miR-181d-5p	XM_005667692.3
ssc-miR-181d-5p	XM_005667693.3
ssc-miR-181d-5p	XM_005667694.3
ssc-miR-181d-5p	XM_013977501.2
ssc-miR-181d-5p	XM_013979447.2
ssc-miR-181d-5p	XM_013980209.2
ssc-miR-181d-5p	XM_013981544.2
ssc-miR-181d-5p	XM_013984750.2
ssc-miR-181d-5p	XM_013984752.2
ssc-miR-181d-5p	XM_013988328.2
ssc-miR-181d-5p	XM_013989222.2
ssc-miR-181d-5p	XM_013989617.2
ssc-miR-181d-5p	XM_013992704.2
ssc-miR-181d-5p	XM_013998075.2
ssc-miR-181d-5p	XM_021062339.1
ssc-miR-190a	XM_021073437.1
ssc-miR-190a	XM_021073344.1
ssc-miR-190a	XM_021074657.1
ssc-miR-190a	XM_013993717.2
ssc-miR-194b-5p	NM_001255969.1
ssc-miR-194b-5p	XM_001928196.4
ssc-miR-194b-5p	XM_001929054.7
ssc-miR-194b-5p	XM_003127705.6
ssc-miR-194b-5p	XM_003133058.4
ssc-miR-194b-5p	XM_005663239.3
ssc-miR-194b-5p	XM_005663698.3
ssc-miR-194b-5p	XM_005664256.3
ssc-miR-194b-5p	XM_005670999.3
ssc-miR-194b-5p	XM_005671000.3
ssc-miR-194b-5p	XM_005671001.3
ssc-miR-194b-5p	XM_013979467.2
ssc-miR-194b-5p	XM_013979468.2
ssc-miR-194b-5p	XM_013982582.2
ssc-miR-194b-5p	XM_013983263.2
ssc-miR-194b-5p	XM_013983264.2
ssc-miR-194b-5p	XM_021063456.1
ssc-miR-194b-5p	XM_021063457.1
ssc-miR-194b-5p	XM_021063458.1
ssc-miR-194b-5p	XM_021063459.1
ssc-miR-194b-5p	XM_021063460.1
ssc-miR-194b-5p	XM_021063461.1
ssc-miR-194b-5p	XM_021063463.1
ssc-miR-194b-5p	XM_021063464.1
ssc-miR-194b-5p	XM_021063465.1
ssc-miR-194b-5p	XM_021073892.1
ssc-miR-194b-5p	XM_021073894.1
ssc-miR-194b-5p	XM_021073895.1
ssc-miR-194b-5p	XM_021073896.1
ssc-miR-194b-5p	XM_021073897.1
ssc-miR-194b-5p	XM_021078138.1
ssc-miR-194b-5p	XM_021078139.1
ssc-miR-194b-5p	XM_021078410.1
ssc-miR-194b-5p	XM_021078413.1
ssc-miR-194b-5p	XM_003133841.4
ssc-miR-199b-3p	NM_001044550.1
ssc-miR-199b-3p	NM_001142834.2
ssc-miR-199b-3p	NM_001244403.1
ssc-miR-199b-3p	NM_001315687.1
ssc-miR-199b-3p	NM_214002.1
ssc-miR-199b-3p	XM_001929670.6
ssc-miR-199b-3p	XM_003481861.4
ssc-miR-199b-3p	XM_005661865.3
ssc-miR-199b-3p	XM_005663493.3
ssc-miR-199b-3p	XM_005666063.2
ssc-miR-199b-3p	XM_005673831.3
ssc-miR-199b-3p	XM_013986332.2
ssc-miR-199b-3p	XM_013986334.2
ssc-miR-199b-3p	XM_013986335.2
ssc-miR-199b-3p	XM_013986336.2
ssc-miR-199b-3p	XM_013986337.2
ssc-miR-199b-3p	XM_013986338.2
ssc-miR-199b-3p	XM_013986339.2
ssc-miR-199b-3p	XM_013995391.2
ssc-miR-199b-3p	XM_013995393.2
ssc-miR-199b-3p	XM_013995394.2
ssc-miR-199b-3p	XM_013995395.2
ssc-miR-199b-3p	XM_013997187.2
ssc-miR-199b-3p	XM_021064891.1
ssc-miR-199b-3p	XM_021064894.1
ssc-miR-199b-3p	XM_021064896.1
ssc-miR-199b-3p	XM_021064897.1
ssc-miR-199b-3p	XM_021064898.1
ssc-miR-199b-3p	XM_021064899.1
ssc-miR-199b-3p	XM_021064902.1
ssc-miR-199b-3p	XM_021064903.1
ssc-miR-199b-3p	XM_021080436.1
ssc-miR-199b-3p	XM_021080484.1
ssc-miR-199b-3p	XM_021086151.1
ssc-miR-199b-3p	XM_021086152.1
ssc-miR-199b-3p	XM_021086153.1
ssc-miR-199b-3p	XM_021088678.1
ssc-miR-199b-3p	XM_021088679.1
ssc-miR-199b-3p	XM_021088680.1
ssc-miR-199b-3p	XM_021088681.1
ssc-miR-199b-3p	XM_021089127.1
ssc-miR-199b-3p	XM_021091205.1
ssc-miR-199b-3p	XM_021091206.1
ssc-miR-199b-3p	XM_021091207.1
ssc-miR-199b-3p	XM_021091208.1
ssc-miR-199b-3p	XM_021091210.1
ssc-miR-199b-3p	XM_021091211.1
ssc-miR-199b-3p	XM_021091588.1
ssc-miR-199b-3p	XM_021091589.1
ssc-miR-199b-3p	XM_021097849.1
ssc-miR-199b-3p	XM_021097850.1
ssc-miR-199b-3p	XM_021098281.1
ssc-miR-199b-3p	XM_021099393.1
ssc-miR-199b-3p	XM_021100128.1
ssc-miR-199b-5p	NM_001113437.2
ssc-miR-199b-5p	NM_001243060.1
ssc-miR-199b-5p	NM_001244647.1
ssc-miR-199b-5p	NM_213795.1
ssc-miR-199b-5p	NM_213849.1
ssc-miR-199b-5p	XM_001924414.4
ssc-miR-199b-5p	XM_001928054.5
ssc-miR-199b-5p	XM_003122904.4
ssc-miR-199b-5p	XM_003125008.4
ssc-miR-199b-5p	XM_003125298.4
ssc-miR-199b-5p	XM_003127015.4
ssc-miR-199b-5p	XM_003135106.6
ssc-miR-199b-5p	XM_003481847.4
ssc-miR-199b-5p	XM_005652343.3
ssc-miR-199b-5p	XM_005659819.3
ssc-miR-199b-5p	XM_005661859.3
ssc-miR-199b-5p	XM_005662463.3
ssc-miR-199b-5p	XM_005662465.3
ssc-miR-199b-5p	XM_005669338.3
ssc-miR-199b-5p	XM_005670258.3
ssc-miR-199b-5p	XM_005670260.3
ssc-miR-199b-5p	XM_005670262.3
ssc-miR-199b-5p	XM_013977540.2
ssc-miR-199b-5p	XM_013977542.2
ssc-miR-199b-5p	XM_013977762.2
ssc-miR-199b-5p	XM_013995377.2
ssc-miR-199b-5p	XM_013995378.2
ssc-miR-199b-5p	XM_013995379.2
ssc-miR-199b-5p	XM_013995380.2
ssc-miR-199b-5p	XM_013996904.2
ssc-miR-199b-5p	XM_013996984.2
ssc-miR-199b-5p	XM_013997239.2
ssc-miR-199b-5p	XM_013997789.2
ssc-miR-199b-5p	XM_013998101.2
ssc-miR-199b-5p	XM_021062241.1
ssc-miR-199b-5p	XM_021063019.1
ssc-miR-199b-5p	XM_021063303.1
ssc-miR-199b-5p	XM_021063304.1
ssc-miR-199b-5p	XM_021063305.1
ssc-miR-199b-5p	XM_021063306.1
ssc-miR-199b-5p	XM_021064119.1
ssc-miR-199b-5p	XM_021065333.1
ssc-miR-199b-5p	XM_021065334.1
ssc-miR-199b-5p	XM_021065335.1
ssc-miR-199b-5p	XM_021065339.1
ssc-miR-199b-5p	XM_021065340.1
ssc-miR-199b-5p	XM_021065342.1
ssc-miR-199b-5p	XM_021065343.1
ssc-miR-199b-5p	XM_021065344.1
ssc-miR-199b-5p	XM_021065345.1
ssc-miR-199b-5p	XM_021074490.1
ssc-miR-199b-5p	XM_021074491.1
ssc-miR-199b-5p	XM_021074492.1
ssc-miR-199b-5p	XM_021074493.1
ssc-miR-206	XM_003354207.4
ssc-miR-206	XM_005657478.3
ssc-miR-206	XM_013985807.2
ssc-miR-206	XM_021073301.1
ssc-miR-206	XM_021073303.1
ssc-miR-206	XM_021073304.1
ssc-miR-206	XM_021073306.1
ssc-miR-206	XM_021076519.1
ssc-miR-206	XM_021084515.1
ssc-miR-206	XM_021094542.1
ssc-miR-206	XM_021094552.1
ssc-miR-206	XM_021098046.1
ssc-miR-206	XM_021098056.1
ssc-miR-206	XM_021098059.1
ssc-miR-206	XM_021098074.1
ssc-miR-206	XM_021098084.1
ssc-miR-218-5p	XM_001925378.5
ssc-miR-218-5p	XM_001929473.5
ssc-miR-218-5p	XM_005670763.3
ssc-miR-218-5p	XM_021102216.1
ssc-miR-218-5p	XM_001929441.4
ssc-miR-218-5p	XM_021068532.1
ssc-miR-218-5p	XM_021082878.1
ssc-miR-218b	NM_214409.2
ssc-miR-218b	XM_001925378.5
ssc-miR-218b	XM_001929441.4
ssc-miR-218b	XM_005670996.3
ssc-miR-218b	XM_021072779.1
ssc-miR-218b	XM_021099542.1
ssc-miR-218b	XM_021102216.1
ssc-miR-218b	XM_021075807.1
ssc-miR-218b	XM_021068532.1
ssc-miR-218b	XM_021099544.1
ssc-miR-218b	XM_021102331.1
ssc-miR-218b	XM_021063848.1
ssc-miR-24-2-5p	NM_001110430.1
ssc-miR-24-2-5p	NM_001195355.1
ssc-miR-24-2-5p	NM_001244465.1
ssc-miR-24-2-5p	XM_001929543.5
ssc-miR-24-2-5p	XM_003135124.6
ssc-miR-24-2-5p	XM_003481278.4
ssc-miR-24-2-5p	XM_005656372.2
ssc-miR-24-2-5p	XM_005656373.3
ssc-miR-24-2-5p	XM_005659404.3
ssc-miR-24-2-5p	XM_005659405.3
ssc-miR-24-2-5p	XM_005662018.3
ssc-miR-24-2-5p	XM_005663636.3
ssc-miR-24-2-5p	XM_005664256.3
ssc-miR-24-2-5p	XM_005665921.3
ssc-miR-24-2-5p	XM_005665922.3
ssc-miR-24-2-5p	XM_005668417.3
ssc-miR-24-2-5p	XM_005673029.3
ssc-miR-24-2-5p	XM_005673761.3
ssc-miR-24-2-5p	XM_013983509.2
ssc-miR-24-2-5p	XM_013985712.2
ssc-miR-24-2-5p	XM_013989140.2
ssc-miR-24-2-5p	XM_013989142.2
ssc-miR-24-2-5p	XM_013989143.2
ssc-miR-24-2-5p	XM_013989146.2
ssc-miR-24-2-5p	XM_013989222.2
ssc-miR-24-2-5p	XM_013989223.2
ssc-miR-24-2-5p	XM_013992698.2
ssc-miR-24-2-5p	XM_013992789.2
ssc-miR-24-2-5p	XM_013992791.2
ssc-miR-24-2-5p	XM_013992792.2
ssc-miR-24-2-5p	XM_013992794.2
ssc-miR-24-2-5p	XM_013995051.2
ssc-miR-24-2-5p	XM_021062280.1
ssc-miR-24-2-5p	XM_021065287.1
ssc-miR-24-2-5p	XM_021065288.1
ssc-miR-24-2-5p	XM_021068419.1
ssc-miR-24-2-5p	XM_021068852.1
ssc-miR-24-2-5p	XM_021068860.1
ssc-miR-24-2-5p	XM_021068868.1
ssc-miR-24-2-5p	XM_021068871.1
ssc-miR-24-2-5p	XM_021068873.1
ssc-miR-24-2-5p	XM_021068882.1
ssc-miR-24-2-5p	XM_021071755.1
ssc-miR-24-2-5p	XM_021071756.1
ssc-miR-24-2-5p	XM_021071757.1
ssc-miR-24-2-5p	XM_021071759.1
ssc-miR-24-2-5p	XM_021071760.1
ssc-miR-24-2-5p	XM_021071761.1
ssc-miR-24-2-5p	XM_021071762.1
ssc-miR-24-2-5p	XM_021074277.1
ssc-miR-24-2-5p	XM_021074381.1
ssc-miR-24-2-5p	XM_021071758.1
ssc-miR-24-3p	NM_001001539.2
ssc-miR-24-3p	NM_001031779.2
ssc-miR-24-3p	NM_001032356.1
ssc-miR-24-3p	NM_001037721.1
ssc-miR-24-3p	NM_001044581.1
ssc-miR-24-3p	NM_001097513.1
ssc-miR-24-3p	NM_001099930.1
ssc-miR-24-3p	NM_001101818.1
ssc-miR-24-3p	NM_001110428.1
ssc-miR-24-3p	NM_001113695.1
ssc-miR-24-3p	NM_001113696.1
ssc-miR-24-3p	NM_001114673.1
ssc-miR-24-3p	NM_001123091.1
ssc-miR-24-3p	NM_001123132.1
ssc-miR-24-3p	NM_001123144.1
ssc-miR-24-3p	NM_001123217.1
ssc-miR-24-3p	NM_001128433.1
ssc-miR-24-3p	NM_001128451.1
ssc-miR-24-3p	NM_001129947.1
ssc-miR-24-3p	NM_001137628.1
ssc-miR-24-3p	NM_001159614.1
ssc-miR-24-3p	NM_001161637.1
ssc-miR-24-3p	NM_001164006.1
ssc-miR-24-3p	NM_001172368.1
ssc-miR-24-3p	NM_001190230.1
ssc-miR-24-3p	NM_001190277.1
ssc-miR-24-3p	NM_001195117.1
ssc-miR-24-3p	NM_001202461.1
ssc-miR-24-3p	NM_001243562.1
ssc-miR-24-3p	NM_001244165.1
ssc-miR-24-3p	NM_001244166.1
ssc-miR-24-3p	NM_001244254.1
ssc-miR-24-3p	NM_001244686.1
ssc-miR-24-3p	NM_001244715.1
ssc-miR-24-3p	NM_001246202.1
ssc-miR-24-3p	NM_001256365.1
ssc-miR-24-3p	NM_001256528.1
ssc-miR-24-3p	NM_001256770.1
ssc-miR-24-3p	NM_001258302.1
ssc-miR-24-3p	NM_001267892.1
ssc-miR-24-3p	NM_001278748.1
ssc-miR-24-3p	NM_001278783.1
ssc-miR-24-3p	NM_001315689.1
ssc-miR-24-3p	NM_213775.2
ssc-miR-24-3p	NM_213812.1
ssc-miR-24-3p	NM_213826.1
ssc-miR-24-3p	NM_213872.1
ssc-miR-24-3p	NM_213954.1
ssc-miR-24-3p	NM_213956.1
ssc-miR-24-3p	NM_213999.2
ssc-miR-24-3p	NM_214034.1
ssc-miR-24-3p	NM_214079.1
ssc-miR-24-3p	NM_214150.1
ssc-miR-24-3p	NM_214230.1
ssc-miR-24-3p	NM_214327.1
ssc-miR-24-3p	NM_214412.1
ssc-miR-24-3p	NM_214442.2
ssc-miR-24-3p	XM_001924228.6
ssc-miR-24-3p	XM_001924319.4
ssc-miR-24-3p	XM_001924543.4
ssc-miR-24-3p	XM_001924813.6
ssc-miR-24-3p	XM_001925083.5
ssc-miR-24-3p	XM_001927458.5
ssc-miR-24-3p	XM_001928051.7
ssc-miR-24-3p	XM_001928342.6
ssc-miR-24-3p	NM_001123138.1
ssc-miR-324	NM_001001267.1
ssc-miR-324	NM_001001540.1
ssc-miR-324	NM_001001546.2
ssc-miR-324	NM_001004048.1
ssc-miR-324	NM_001005152.2
ssc-miR-324	NM_001011505.1
ssc-miR-324	NM_001014971.1
ssc-miR-324	NM_001044525.1
ssc-miR-324	NM_001078685.1
ssc-miR-324	NM_001083931.1
ssc-miR-324	NM_001097417.1
ssc-miR-324	NM_001098589.1
ssc-miR-324	NM_001099935.1
ssc-miR-324	NM_001105288.1
ssc-miR-324	NM_001111257.2
ssc-miR-324	NM_001114672.1
ssc-miR-324	NM_001123042.1
ssc-miR-324	NM_001123093.1
ssc-miR-324	NM_001123106.1
ssc-miR-324	NM_001123129.1
ssc-miR-324	NM_001123174.1
ssc-miR-324	NM_001129959.1
ssc-miR-324	NM_001143692.2
ssc-miR-324	NM_001143727.1
ssc-miR-324	NM_001145218.2
ssc-miR-324	NM_001159310.1
ssc-miR-324	NM_001166673.1
ssc-miR-324	NM_001168415.1
ssc-miR-324	NM_001177910.1
ssc-miR-324	NM_001185139.1
ssc-miR-324	NM_001190278.1
ssc-miR-324	NM_001195321.1
ssc-miR-324	NM_001195781.1
ssc-miR-324	NM_001204774.1
ssc-miR-324	NM_001206429.1
ssc-miR-324	NM_001244268.1
ssc-miR-324	NM_001244359.1
ssc-miR-324	NM_001244436.1
ssc-miR-324	NM_001244704.1
ssc-miR-324	NM_001246221.1
ssc-miR-324	NM_001252388.1
ssc-miR-324	NM_001256593.1
ssc-miR-324	NM_001267851.1
ssc-miR-324	NM_001278781.1
ssc-miR-324	NM_001315574.1
ssc-miR-324	NM_213857.1
ssc-miR-324	NM_213903.1
ssc-miR-324	NM_214001.1
ssc-miR-324	NM_214021.1
ssc-miR-324	NM_214037.1
ssc-miR-324	NM_214171.2
ssc-miR-324	NM_214179.1
ssc-miR-324	NM_214208.2
ssc-miR-324	NM_214229.1
ssc-miR-324	NM_214280.1
ssc-miR-324	NM_214283.1
ssc-miR-324	NM_214287.1
ssc-miR-324	NM_214325.2
ssc-miR-324	NM_214383.1
ssc-miR-324	XM_001924747.5
ssc-miR-324	XM_001926519.6
ssc-miR-324	XM_001926534.4
ssc-miR-324	XM_001926947.5
ssc-miR-324	XM_001927058.4
ssc-miR-339-5p	NM_001001771.1
ssc-miR-339-5p	NM_001001907.1
ssc-miR-339-5p	NM_001004033.1
ssc-miR-339-5p	NM_001004040.1
ssc-miR-339-5p	NM_001004048.1
ssc-miR-339-5p	NM_001011646.1
ssc-miR-339-5p	NM_001011647.1
ssc-miR-339-5p	NM_001038636.1
ssc-miR-339-5p	NM_001044578.1
ssc-miR-339-5p	NM_001044602.1
ssc-miR-339-5p	NM_001044603.2
ssc-miR-339-5p	NM_001077221.1
ssc-miR-339-5p	NM_001097515.2
ssc-miR-339-5p	NM_001098598.1
ssc-miR-339-5p	NM_001099930.1
ssc-miR-339-5p	NM_001101825.1
ssc-miR-339-5p	NM_001102680.2
ssc-miR-339-5p	NM_001113039.2
ssc-miR-339-5p	NM_001113219.1
ssc-miR-339-5p	NM_001113444.1
ssc-miR-339-5p	NM_001113694.1
ssc-miR-339-5p	NM_001114272.1
ssc-miR-339-5p	NM_001114675.1
ssc-miR-339-5p	NM_001122995.2
ssc-miR-339-5p	NM_001123042.1
ssc-miR-339-5p	NM_001123087.1
ssc-miR-339-5p	NM_001123119.1
ssc-miR-339-5p	NM_001123128.1
ssc-miR-339-5p	NM_001123138.1
ssc-miR-339-5p	NM_001123144.1
ssc-miR-339-5p	NM_001123153.1
ssc-miR-339-5p	NM_001123204.1
ssc-miR-339-5p	NM_001129952.1
ssc-miR-339-5p	NM_001130729.1
ssc-miR-339-5p	NM_001142834.2
ssc-miR-339-5p	NM_001143724.1
ssc-miR-339-5p	NM_001159659.1
ssc-miR-339-5p	NM_001159777.1
ssc-miR-339-5p	NM_001167591.1
ssc-miR-339-5p	NM_001168418.1
ssc-miR-339-5p	NM_001170827.1
ssc-miR-339-5p	NM_001170828.1
ssc-miR-339-5p	NM_001171753.1
ssc-miR-339-5p	NM_001171754.1
ssc-miR-339-5p	NM_001185129.1
ssc-miR-339-5p	NM_001190191.1
ssc-miR-339-5p	NM_001190254.1
ssc-miR-339-5p	NM_001195330.2
ssc-miR-339-5p	NM_001195371.1
ssc-miR-339-5p	NM_001205279.1
ssc-miR-339-5p	NM_001206352.1
ssc-miR-339-5p	NM_001206360.1
ssc-miR-339-5p	NM_001243483.1
ssc-miR-339-5p	NM_001243492.1
ssc-miR-339-5p	NM_001243544.1
ssc-miR-339-5p	NM_001243639.1
ssc-miR-339-5p	NM_001244155.1
ssc-miR-339-5p	NM_001244159.1
ssc-miR-339-5p	NM_001244253.1
ssc-miR-339-5p	NM_001244296.1
ssc-miR-339-5p	NM_001244457.1
ssc-miR-339-5p	NM_001244473.1
ssc-miR-339-5p	NM_001244479.1
ssc-miR-339-5p	NM_001244521.1
ssc-miR-339-5p	NM_001244732.1
ssc-miR-369	XM_021079749.1
ssc-miR-369	XM_021070161.1
ssc-miR-383	NM_001001537.1
ssc-miR-383	NM_001001546.2
ssc-miR-383	NM_001001620.1
ssc-miR-383	NM_001004028.1
ssc-miR-383	NM_001005152.2
ssc-miR-383	NM_001005350.2
ssc-miR-383	NM_001005844.1
ssc-miR-383	NM_001012299.1
ssc-miR-383	NM_001031778.1
ssc-miR-383	NM_001031798.1
ssc-miR-383	NM_001037996.1
ssc-miR-383	NM_001044545.1
ssc-miR-383	NM_001044578.1
ssc-miR-383	NM_001044598.2
ssc-miR-383	NM_001044600.1
ssc-miR-383	NM_001044603.2
ssc-miR-383	NM_001077226.1
ssc-miR-383	NM_001078668.1
ssc-miR-383	NM_001078679.1
ssc-miR-383	NM_001083930.1
ssc-miR-383	NM_001097418.2
ssc-miR-383	NM_001097520.1
ssc-miR-383	NM_001098589.1
ssc-miR-383	NM_001099937.2
ssc-miR-383	NM_001101822.1
ssc-miR-383	NM_001104950.1
ssc-miR-383	NM_001105288.1
ssc-miR-383	NM_001105293.1
ssc-miR-383	NM_001105295.1
ssc-miR-383	NM_001110432.1
ssc-miR-383	NM_001113444.1
ssc-miR-383	NM_001113448.1
ssc-miR-383	NM_001114671.1
ssc-miR-383	NM_001123108.1
ssc-miR-383	NM_001123138.1
ssc-miR-383	NM_001123147.1
ssc-miR-383	NM_001123149.1
ssc-miR-383	NM_001123159.1
ssc-miR-383	NM_001123212.1
ssc-miR-383	NM_001123214.1
ssc-miR-383	NM_001123219.1
ssc-miR-383	NM_001128445.1
ssc-miR-383	NM_001128489.1
ssc-miR-383	NM_001129965.1
ssc-miR-383	NM_001129977.1
ssc-miR-383	NM_001130733.1
ssc-miR-383	NM_001134346.2
ssc-miR-383	NM_001136512.1
ssc-miR-383	NM_001137634.1
ssc-miR-383	NM_001139475.1
ssc-miR-383	NM_001142839.2
ssc-miR-383	NM_001143725.1
ssc-miR-383	NM_001144843.1
ssc-miR-383	NM_001144844.1
ssc-miR-383	NM_001145019.1
ssc-miR-383	NM_001145750.2
ssc-miR-383	NM_001145752.1
ssc-miR-383	NM_001161636.1
ssc-miR-383	NM_001161641.1
ssc-miR-383	NM_001162401.1
ssc-miR-383	NM_001166320.1
ssc-miR-383	NM_001167835.1
ssc-miR-383	NM_001171752.1
ssc-miR-383	NM_001172586.1
ssc-miR-383	NM_001177931.1
ssc-miR-383	NM_001185129.1
ssc-miR-383	NM_001185836.1
ssc-miR-383	NM_001190190.1
ssc-miR-383	NM_001190278.1
ssc-miR-383	NM_001190281.1
ssc-miR-383	NM_001195378.1
ssc-miR-383	NM_001200042.1
ssc-miR-383	NM_001204393.1
ssc-miR-383	NM_001204771.1
ssc-miR-383	NM_001206429.1
ssc-miR-383	NM_001206535.1
ssc-miR-383	NM_001243190.1
ssc-miR-383	NM_001243276.1
ssc-miR-383	NM_001243291.1
ssc-miR-383	NM_001243381.1
ssc-miR-383	NM_001243391.1
ssc-miR-383	NM_001243411.1
ssc-miR-383	NM_001243460.1
ssc-miR-383	NM_001243470.1
ssc-miR-383	NM_001243478.1
ssc-miR-383	NM_001243482.1
ssc-miR-383	NM_001243495.1
ssc-miR-383	NM_001243616.1
ssc-miR-383	NM_001137636.2
ssc-miR-411	XM_021101056.1
ssc-miR-432-5p	NM_001001868.1
ssc-miR-432-5p	NM_001004043.1
ssc-miR-432-5p	NM_001007195.1
ssc-miR-432-5p	NM_001012408.1
ssc-miR-432-5p	NM_001044529.1
ssc-miR-432-5p	NM_001044532.1
ssc-miR-432-5p	NM_001044576.1
ssc-miR-432-5p	NM_001083932.1
ssc-miR-432-5p	NM_001097441.2
ssc-miR-432-5p	NM_001098599.1
ssc-miR-432-5p	NM_001103210.1
ssc-miR-432-5p	NM_001123078.1
ssc-miR-432-5p	NM_001123107.1
ssc-miR-432-5p	NM_001123114.1
ssc-miR-432-5p	NM_001123141.1
ssc-miR-432-5p	NM_001123196.1
ssc-miR-432-5p	NM_001130241.2
ssc-miR-432-5p	NM_001143719.1
ssc-miR-432-5p	NM_001143928.1
ssc-miR-432-5p	NM_001145381.1
ssc-miR-432-5p	NM_001145750.2
ssc-miR-432-5p	NM_001163411.1
ssc-miR-432-5p	NM_001167633.1
ssc-miR-432-5p	NM_001185154.1
ssc-miR-432-5p	NM_001185155.1
ssc-miR-432-5p	NM_001201383.2
ssc-miR-432-5p	NM_001204900.1
ssc-miR-432-5p	NM_001206431.1
ssc-miR-432-5p	NM_001243183.1
ssc-miR-432-5p	NM_001243360.1
ssc-miR-432-5p	NM_001244066.1
ssc-miR-432-5p	NM_001244422.2
ssc-miR-432-5p	NM_001244653.1
ssc-miR-432-5p	NM_001315740.1
ssc-miR-432-5p	NM_213773.1
ssc-miR-432-5p	NM_213876.1
ssc-miR-432-5p	NM_213969.1
ssc-miR-432-5p	NM_214148.2
ssc-miR-432-5p	NM_214152.2
ssc-miR-432-5p	NM_214196.1
ssc-miR-432-5p	NM_214198.1
ssc-miR-432-5p	NM_214375.1
ssc-miR-432-5p	NM_214410.1
ssc-miR-432-5p	XM_001927747.4
ssc-miR-432-5p	XM_001929318.6
ssc-miR-432-5p	XM_003121151.4
ssc-miR-432-5p	XM_003123182.4
ssc-miR-432-5p	XM_003123350.4
ssc-miR-432-5p	XM_003126802.4
ssc-miR-432-5p	XM_003127512.4
ssc-miR-432-5p	XM_003127633.4
ssc-miR-432-5p	XM_003127827.5
ssc-miR-432-5p	XM_003127981.4
ssc-miR-432-5p	XM_003130005.5
ssc-miR-432-5p	XM_003130007.4
ssc-miR-432-5p	XM_003130106.4
ssc-miR-432-5p	XM_003130111.5
ssc-miR-4332	NM_001002832.1
ssc-miR-4332	NM_001005730.1
ssc-miR-4332	NM_001006591.1
ssc-miR-4332	NM_001008690.1
ssc-miR-4332	NM_001012613.1
ssc-miR-4332	NM_001031797.1
ssc-miR-4332	NM_001032356.1
ssc-miR-4332	NM_001038007.1
ssc-miR-4332	NM_001044536.1
ssc-miR-4332	NM_001044551.2
ssc-miR-4332	NM_001044624.2
ssc-miR-4332	NM_001048188.1
ssc-miR-4332	NM_001078662.1
ssc-miR-4332	NM_001097495.1
ssc-miR-4332	NM_001101816.2
ssc-miR-4332	NM_001111257.2
ssc-miR-4332	NM_001113442.2
ssc-miR-4332	NM_001113452.1
ssc-miR-4332	NM_001113698.1
ssc-miR-4332	NM_001114672.1
ssc-miR-4332	NM_001122990.1
ssc-miR-4332	NM_001122991.1
ssc-miR-4332	NM_001123092.1
ssc-miR-4332	NM_001123105.1
ssc-miR-4332	NM_001123137.1
ssc-miR-4332	NM_001123147.1
ssc-miR-4332	NM_001123148.1
ssc-miR-4332	NM_001123152.1
ssc-miR-4332	NM_001123158.1
ssc-miR-4332	NM_001123182.1
ssc-miR-4332	NM_001123197.1
ssc-miR-4332	NM_001129805.1
ssc-miR-4332	NM_001130534.1
ssc-miR-4332	NM_001134349.2
ssc-miR-4332	NM_001134351.2
ssc-miR-4332	NM_001141985.1
ssc-miR-4332	NM_001141989.1
ssc-miR-4332	NM_001143691.1
ssc-miR-4332	NM_001143694.1
ssc-miR-4332	NM_001143700.1
ssc-miR-4332	NM_001160084.1
ssc-miR-4332	NM_001160086.2
ssc-miR-4332	NM_001161639.1
ssc-miR-4332	NM_001162887.1
ssc-miR-4332	NM_001167628.1
ssc-miR-4332	NM_001171753.1
ssc-miR-4332	NM_001177919.1
ssc-miR-4332	NM_001185142.1
ssc-miR-4332	NM_001190278.1
ssc-miR-4332	NM_001190283.1
ssc-miR-4332	NM_001195113.1
ssc-miR-4332	NM_001195119.1
ssc-miR-4332	NM_001195343.1
ssc-miR-4332	NM_001195378.1
ssc-miR-4332	NM_001198919.1
ssc-miR-4332	NM_001201485.1
ssc-miR-4332	NM_001243189.1
ssc-miR-4332	NM_001243360.1
ssc-miR-4332	NM_001243375.1
ssc-miR-4332	NM_001243379.1
ssc-miR-4332	NM_001243434.1
ssc-miR-4332	NM_001243528.1
ssc-miR-4332	NM_001243618.1
ssc-miR-4332	NM_001243822.1
ssc-miR-4332	NM_001244172.1
ssc-miR-4332	NM_001244173.1
ssc-miR-4332	NM_001244178.1
ssc-miR-4332	NM_001244299.1
ssc-miR-4332	NM_001244473.1
ssc-miR-4332	NM_001122987.1
ssc-miR-4334-3p	NM_001001907.1
ssc-miR-4334-3p	NM_001004033.1
ssc-miR-4334-3p	NM_001004040.1
ssc-miR-4334-3p	NM_001004048.1
ssc-miR-4334-3p	NM_001011646.1
ssc-miR-4334-3p	NM_001011647.1
ssc-miR-4334-3p	NM_001044602.1
ssc-miR-4334-3p	NM_001077221.1
ssc-miR-4334-3p	NM_001101825.1
ssc-miR-4334-3p	NM_001102680.2
ssc-miR-4334-3p	NM_001113039.2
ssc-miR-4334-3p	NM_001113219.1
ssc-miR-4334-3p	NM_001113444.1
ssc-miR-4334-3p	NM_001113694.1
ssc-miR-4334-3p	NM_001114272.1
ssc-miR-4334-3p	NM_001114675.1
ssc-miR-4334-3p	NM_001123087.1
ssc-miR-4334-3p	NM_001123119.1
ssc-miR-4334-3p	NM_001123138.1
ssc-miR-4334-3p	NM_001123144.1
ssc-miR-4334-3p	NM_001123153.1
ssc-miR-4334-3p	NM_001123204.1
ssc-miR-4334-3p	NM_001129952.1
ssc-miR-4334-3p	NM_001142834.2
ssc-miR-4334-3p	NM_001143724.1
ssc-miR-4334-3p	NM_001159659.1
ssc-miR-4334-3p	NM_001159777.1
ssc-miR-4334-3p	NM_001163060.1
ssc-miR-4334-3p	NM_001167591.1
ssc-miR-4334-3p	NM_001168418.1
ssc-miR-4334-3p	NM_001170827.1
ssc-miR-4334-3p	NM_001170828.1
ssc-miR-4334-3p	NM_001171754.1
ssc-miR-4334-3p	NM_001185129.1
ssc-miR-4334-3p	NM_001190191.1
ssc-miR-4334-3p	NM_001195330.2
ssc-miR-4334-3p	NM_001205279.1
ssc-miR-4334-3p	NM_001206352.1
ssc-miR-4334-3p	NM_001243483.1
ssc-miR-4334-3p	NM_001243492.1
ssc-miR-4334-3p	NM_001244155.1
ssc-miR-4334-3p	NM_001244159.1
ssc-miR-4334-3p	NM_001244253.1
ssc-miR-4334-3p	NM_001244296.1
ssc-miR-4334-3p	NM_001244457.1
ssc-miR-4334-3p	NM_001244473.1
ssc-miR-4334-3p	NM_001244479.1
ssc-miR-4334-3p	NM_001244521.1
ssc-miR-4334-3p	NM_001244861.1
ssc-miR-4334-3p	NM_001246264.2
ssc-miR-4334-3p	NM_001253922.1
ssc-miR-4334-3p	NM_001257275.1
ssc-miR-4334-3p	NM_001267845.1
ssc-miR-4334-3p	NM_001278769.1
ssc-miR-4334-3p	NM_001285967.1
ssc-miR-4334-3p	NM_001293316.1
ssc-miR-4334-3p	NM_001293317.1
ssc-miR-4334-3p	NM_001315577.1
ssc-miR-4334-3p	NM_001315695.1
ssc-miR-4334-3p	NM_001315742.1
ssc-miR-4334-3p	NM_213749.1
ssc-miR-4334-3p	NM_213770.1
ssc-miR-4334-3p	NM_213840.1
ssc-miR-4334-3p	NM_213954.1
ssc-miR-4334-3p	NM_213979.1
ssc-miR-451	XM_021090262.1
ssc-miR-451	XM_021090263.1
ssc-miR-451	XM_021090276.1
ssc-miR-451	XM_021090277.1
ssc-miR-451	XM_021090278.1
ssc-miR-451	XM_021090284.1
ssc-miR-451	XM_021090287.1
ssc-miR-451	XM_021090288.1
ssc-miR-451	XM_021088652.1
ssc-miR-451	XM_003125595.4
ssc-miR-451	XM_001926378.4
ssc-miR-451	XM_021093212.1
ssc-miR-451	XM_021066066.1
ssc-miR-493-5p	NM_001044556.1
ssc-miR-493-5p	NM_214418.2
ssc-miR-493-5p	XM_001929653.5
ssc-miR-493-5p	XM_003121978.4
ssc-miR-493-5p	XM_003353597.4
ssc-miR-493-5p	XM_003353850.4
ssc-miR-493-5p	XM_005654511.3
ssc-miR-493-5p	XM_005654512.3
ssc-miR-493-5p	XM_005660302.3
ssc-miR-493-5p	XM_005663147.1
ssc-miR-493-5p	XM_005670948.3
ssc-miR-493-5p	XM_013990808.2
ssc-miR-493-5p	XM_013990809.2
ssc-miR-493-5p	XM_013993717.2
ssc-miR-493-5p	XM_013994310.2
ssc-miR-493-5p	XM_013994311.2
ssc-miR-493-5p	XM_013996811.2
ssc-miR-493-5p	XM_021065386.1
ssc-miR-493-5p	XM_021072487.1
ssc-miR-493-5p	XM_021072788.1
ssc-miR-493-5p	XM_021077997.1
ssc-miR-493-5p	XM_021079117.1
ssc-miR-493-5p	XM_021083026.1
ssc-miR-493-5p	XM_021083028.1
ssc-miR-493-5p	XM_021083029.1
ssc-miR-493-5p	XM_021087317.1
ssc-miR-493-5p	XM_021094880.1
ssc-miR-493-5p	XM_021094888.1
ssc-miR-493-5p	XM_021094892.1
ssc-miR-493-5p	XM_021094899.1
ssc-miR-493-5p	XM_021094906.1
ssc-miR-493-5p	XM_021100734.1
ssc-miR-493-5p	XM_021065751.1
ssc-miR-493-5p	XM_021069803.1
ssc-miR-493-5p	XM_001924990.5
ssc-miR-493-5p	XM_021082812.1
ssc-miR-493-5p	XM_021078898.1
ssc-miR-493-5p	XM_003360251.5
ssc-miR-493-5p	XM_005662490.3
ssc-miR-542-5p	NM_001012297.1
ssc-miR-542-5p	NM_001014971.1
ssc-miR-542-5p	NM_001038638.1
ssc-miR-542-5p	NM_001097448.1
ssc-miR-542-5p	NM_001114275.1
ssc-miR-542-5p	NM_001114675.1
ssc-miR-542-5p	NM_001129949.1
ssc-miR-542-5p	NM_001135959.1
ssc-miR-542-5p	NM_001205094.1
ssc-miR-542-5p	NM_001244578.1
ssc-miR-542-5p	NM_001315750.1
ssc-miR-542-5p	NM_001323055.1
ssc-miR-542-5p	NM_001323056.1
ssc-miR-542-5p	NM_213810.3
ssc-miR-542-5p	NM_213876.1
ssc-miR-542-5p	NM_213904.1
ssc-miR-542-5p	NM_214007.1
ssc-miR-542-5p	XM_001926736.7
ssc-miR-542-5p	XM_001928335.6
ssc-miR-542-5p	XM_001928949.6
ssc-miR-542-5p	XM_003121757.5
ssc-miR-542-5p	XM_003126217.4
ssc-miR-542-5p	XM_003126597.6
ssc-miR-542-5p	XM_003126813.4
ssc-miR-542-5p	XM_003127039.3
ssc-miR-542-5p	XM_003129074.5
ssc-miR-542-5p	XM_003135341.5
ssc-miR-542-5p	XM_003481758.4
ssc-miR-542-5p	XM_003482418.4
ssc-miR-542-5p	XM_003482826.4
ssc-miR-542-5p	XM_003482828.4
ssc-miR-542-5p	XM_003482829.4
ssc-miR-542-5p	XM_005653796.3
ssc-miR-542-5p	XM_005653799.3
ssc-miR-542-5p	XM_005655296.3
ssc-miR-542-5p	XM_005657665.3
ssc-miR-542-5p	XM_005660399.3
ssc-miR-542-5p	XM_005660534.3
ssc-miR-542-5p	XM_005660772.3
ssc-miR-542-5p	XM_005663697.3
ssc-miR-542-5p	XM_005663698.3
ssc-miR-542-5p	XM_005663699.3
ssc-miR-542-5p	XM_005664345.3
ssc-miR-542-5p	XM_005665729.3
ssc-miR-542-5p	NM_213851.1
ssc-miR-545-3p	XM_021067503.1
ssc-miR-545-3p	XM_021067504.1
ssc-miR-545-3p	XM_021067506.1
ssc-miR-545-3p	XM_021067507.1
ssc-miR-545-3p	XM_021096891.1
ssc-miR-545-3p	XM_021096894.1
ssc-miR-545-3p	XM_021096895.1
ssc-miR-545-3p	XM_013995412.2
ssc-miR-545-3p	XM_021085703.1
ssc-miR-545-3p	XM_021079245.1
ssc-miR-551a	NM_001123172.1
ssc-miR-551a	NM_001123194.1
ssc-miR-551a	NM_001128442.1
ssc-miR-551a	NM_001130215.2
ssc-miR-551a	NM_001243492.1
ssc-miR-551a	NM_001244149.1
ssc-miR-551a	NM_001252048.1
ssc-miR-551a	NM_214070.1
ssc-miR-551a	NM_214112.1
ssc-miR-551a	NM_214400.1
ssc-miR-551a	NM_214451.1
ssc-miR-551a	XM_001925977.5
ssc-miR-551a	XM_001926256.5
ssc-miR-551a	XM_001927113.6
ssc-miR-551a	XM_001929539.5
ssc-miR-551a	XM_003122250.4
ssc-miR-551a	XM_003123882.5
ssc-miR-551a	XM_003124261.5
ssc-miR-551a	XM_003124475.4
ssc-miR-551a	XM_003127824.6
ssc-miR-551a	XM_003128939.6
ssc-miR-551a	XM_003130966.4
ssc-miR-551a	XM_003133541.6
ssc-miR-551a	XM_003354942.4
ssc-miR-551a	XM_003356661.2
ssc-miR-551a	XM_003358599.3
ssc-miR-551a	XM_003481192.4
ssc-miR-551a	XM_003482655.4
ssc-miR-551a	XM_003482656.4
ssc-miR-551a	XM_003482828.4
ssc-miR-551a	XM_003483088.4
ssc-miR-551a	XM_003483156.4
ssc-miR-551a	XM_005655075.3
ssc-miR-551a	XM_005657066.3
ssc-miR-551a	XM_005657247.3
ssc-miR-551a	XM_005657341.3
ssc-miR-551a	XM_005657342.3
ssc-miR-551a	XM_005660427.3
ssc-miR-551a	XM_005660534.3
ssc-miR-551a	XM_005660666.3
ssc-miR-551a	XM_005660668.3
ssc-miR-551a	XM_005660873.3
ssc-miR-551a	XM_005661528.3
ssc-miR-551a	XM_005662360.3
ssc-miR-551a	XM_005665258.2
ssc-miR-551a	XM_005665408.3
ssc-miR-551a	XM_005666127.3
ssc-miR-551a	XM_005666216.3
ssc-miR-551a	XM_005666610.3
ssc-miR-551a	XM_005668185.3
ssc-miR-551a	XM_005668187.3
ssc-miR-551a	XM_005669147.3
ssc-miR-671-5p	NM_001001260.1
ssc-miR-671-5p	NM_001001546.2
ssc-miR-671-5p	NM_001001623.1
ssc-miR-671-5p	NM_001001636.1
ssc-miR-671-5p	NM_001001641.1
ssc-miR-671-5p	NM_001001643.1
ssc-miR-671-5p	NM_001001648.4
ssc-miR-671-5p	NM_001001771.1
ssc-miR-671-5p	NM_001001908.2
ssc-miR-671-5p	NM_001003924.1
ssc-miR-671-5p	NM_001004035.1
ssc-miR-671-5p	NM_001004038.1
ssc-miR-671-5p	NM_001005153.1
ssc-miR-671-5p	NM_001005730.1
ssc-miR-671-5p	NM_001005844.1
ssc-miR-671-5p	NM_001007103.1
ssc-miR-671-5p	NM_001009576.1
ssc-miR-671-5p	NM_001011646.1
ssc-miR-671-5p	NM_001011647.1
ssc-miR-671-5p	NM_001011648.1
ssc-miR-671-5p	NM_001014971.1
ssc-miR-671-5p	NM_001025224.2
ssc-miR-671-5p	NM_001031776.1
ssc-miR-671-5p	NM_001032355.1
ssc-miR-671-5p	NM_001032376.2
ssc-miR-671-5p	NM_001037149.1
ssc-miR-671-5p	NM_001037998.1
ssc-miR-671-5p	NM_001038002.1
ssc-miR-671-5p	NM_001038632.1
ssc-miR-671-5p	NM_001038638.1
ssc-miR-671-5p	NM_001039748.2
ssc-miR-671-5p	NM_001044527.1
ssc-miR-671-5p	NM_001044529.1
ssc-miR-671-5p	NM_001044549.1
ssc-miR-671-5p	NM_001044559.1
ssc-miR-671-5p	NM_001044563.1
ssc-miR-671-5p	NM_001044575.2
ssc-miR-671-5p	NM_001044578.1
ssc-miR-671-5p	NM_001044579.1
ssc-miR-671-5p	NM_001044587.1
ssc-miR-671-5p	NM_001044608.1
ssc-miR-671-5p	NM_001044612.1
ssc-miR-671-5p	NM_001044616.1
ssc-miR-671-5p	NM_001044619.1
ssc-miR-671-5p	NM_001044623.1
ssc-miR-671-5p	NM_001048186.2
ssc-miR-671-5p	NM_001048188.1
ssc-miR-671-5p	NM_001078688.1
ssc-miR-671-5p	NM_001080206.2
ssc-miR-671-5p	NM_001083930.1
ssc-miR-671-5p	NM_001083931.1
ssc-miR-671-5p	NM_001097412.1
ssc-miR-671-5p	NM_001097443.1
ssc-miR-671-5p	NM_001097452.1
ssc-miR-671-5p	NM_001097459.1
ssc-miR-671-5p	NM_001097501.2
ssc-miR-671-5p	NM_001097512.1
ssc-miR-671-5p	NM_001098582.2
ssc-miR-671-5p	NM_001099698.1
ssc-miR-671-5p	NM_001099927.1
ssc-miR-671-5p	NM_001099937.2
ssc-miR-671-5p	NM_001100189.1
ssc-miR-671-5p	NM_001101814.1
ssc-miR-671-5p	NM_001102679.1
ssc-miR-671-5p	NM_001105053.1
ssc-miR-671-5p	NM_001105288.1
ssc-miR-671-5p	NM_001105289.1
ssc-miR-671-5p	NM_001105295.1
ssc-miR-671-5p	NM_001105302.1
ssc-miR-671-5p	NM_001105303.1
ssc-miR-671-5p	NM_001105312.1
ssc-miR-671-5p	NM_001110171.1
ssc-miR-671-5p	NM_001110176.1
ssc-miR-671-5p	NM_001110420.1
ssc-miR-671-5p	NM_001112680.1
ssc-miR-671-5p	NM_001112691.1
ssc-miR-671-5p	NM_001113047.1
ssc-miR-671-5p	NM_001113288.1
ssc-miR-671-5p	NM_001113439.1
ssc-miR-671-5p	NM_001113696.1
ssc-miR-671-5p	NM_001114273.1
ssc-miR-671-5p	NM_001114277.1
ssc-miR-671-5p	NM_001114282.1
ssc-miR-671-5p	NM_001114670.1
ssc-miR-671-5p	NM_001115155.1
ssc-miR-671-5p	NM_001122986.2
ssc-miR-671-5p	NM_001123085.1
ssc-miR-671-5p	NM_001123089.2
ssc-miR-671-5p	NM_001123096.1
ssc-miR-671-5p	NM_001123100.1
ssc-miR-671-5p	NM_001123101.2
ssc-miR-671-5p	NM_001123113.1
ssc-miR-671-5p	NM_001123118.1
ssc-miR-671-5p	NM_001123120.1
ssc-miR-671-5p	NM_001123147.1
ssc-miR-671-5p	NM_001099930.1
ssc-miR-676-5p	NM_001123141.1
ssc-miR-676-5p	NM_001139474.1
ssc-miR-676-5p	NM_001143929.1
ssc-miR-676-5p	NM_001206893.1
ssc-miR-676-5p	NM_214020.1
ssc-miR-676-5p	XM_003125849.5
ssc-miR-676-5p	XM_003134715.4
ssc-miR-676-5p	XM_003134891.6
ssc-miR-676-5p	XM_003481616.4
ssc-miR-676-5p	XM_005655599.3
ssc-miR-676-5p	XM_005657128.3
ssc-miR-676-5p	XM_005667141.3
ssc-miR-676-5p	XM_005670994.3
ssc-miR-676-5p	XM_013981765.2
ssc-miR-676-5p	XM_013983535.2
ssc-miR-676-5p	XM_013985693.2
ssc-miR-676-5p	XM_013985694.2
ssc-miR-676-5p	XM_013985695.2
ssc-miR-676-5p	XM_013985696.2
ssc-miR-676-5p	XM_013985697.2
ssc-miR-676-5p	XM_013988306.2
ssc-miR-676-5p	XM_013989579.2
ssc-miR-676-5p	XM_013990172.2
ssc-miR-676-5p	XM_013990173.2
ssc-miR-676-5p	XM_013998342.2
ssc-miR-676-5p	XM_013998554.2
ssc-miR-676-5p	XM_013977480.2
ssc-miR-874	NM_001001262.1
ssc-miR-874	NM_001001536.2
ssc-miR-874	NM_001001546.2
ssc-miR-874	NM_001001908.2
ssc-miR-874	NM_001005730.1
ssc-miR-874	NM_001006593.2
ssc-miR-874	NM_001007193.1
ssc-miR-874	NM_001008687.1
ssc-miR-874	NM_001011508.2
ssc-miR-874	NM_001014971.1
ssc-miR-874	NM_001031788.1
ssc-miR-874	NM_001031796.1
ssc-miR-874	NM_001037721.1
ssc-miR-874	NM_001038644.1
ssc-miR-874	NM_001039749.1
ssc-miR-874	NM_001044527.1
ssc-miR-874	NM_001044529.1
ssc-miR-874	NM_001044536.1
ssc-miR-874	NM_001044543.1
ssc-miR-874	NM_001044550.1
ssc-miR-874	NM_001044571.1
ssc-miR-874	NM_001044574.2
ssc-miR-874	NM_001044577.1
ssc-miR-874	NM_001044578.1
ssc-miR-874	NM_001044592.1
ssc-miR-874	NM_001044604.1
ssc-miR-874	NM_001044607.2
ssc-miR-874	NM_001048186.2
ssc-miR-874	NM_001048188.1
ssc-miR-874	NM_001078685.1
ssc-miR-874	NM_001083930.1
ssc-miR-874	NM_001097426.1
ssc-miR-874	NM_001097429.1
ssc-miR-874	NM_001097434.1
ssc-miR-874	NM_001098589.1
ssc-miR-874	NM_001099928.1
ssc-miR-874	NM_001099930.1
ssc-miR-874	NM_001099935.1
ssc-miR-874	NM_001100192.1
ssc-miR-874	NM_001101031.2
ssc-miR-874	NM_001101822.1
ssc-miR-874	NM_001105295.1
ssc-miR-874	NM_001105308.1
ssc-miR-874	NM_001105310.1
ssc-miR-874	NM_001113047.1
ssc-miR-874	NM_001113436.1
ssc-miR-874	NM_001113442.2
ssc-miR-874	NM_001113444.1
ssc-miR-874	NM_001113451.1
ssc-miR-874	NM_001113695.1
ssc-miR-874	NM_001113696.1
ssc-miR-874	NM_001113700.1
ssc-miR-874	NM_001114670.1
ssc-miR-874	NM_001114671.1
ssc-miR-874	NM_001114674.1
ssc-miR-874	NM_001115136.1
ssc-miR-874	NM_001123079.1
ssc-miR-874	NM_001123085.1
ssc-miR-874	NM_001123087.1
ssc-miR-874	NM_001123108.1
ssc-miR-874	NM_001123138.1
ssc-miR-874	NM_001123148.1
ssc-miR-874	NM_001123162.1
ssc-miR-874	NM_001123203.1
ssc-miR-874	NM_001123214.1
ssc-miR-874	NM_001123220.1
ssc-miR-874	NM_001128433.1
ssc-miR-874	NM_001128452.1
ssc-miR-874	NM_001128477.1
ssc-miR-874	NM_001128490.1
ssc-miR-874	NM_001130219.1
ssc-miR-874	NM_001130230.1
ssc-miR-874	NM_001130241.2
ssc-miR-874	NM_001130246.1
ssc-miR-874	NM_001134349.2
ssc-miR-874	NM_001134350.2
ssc-miR-874	NM_001134354.1
ssc-miR-874	NM_001134358.4
ssc-miR-874	NM_001135962.1
ssc-miR-874	NM_001135966.1
ssc-miR-874	NM_001141984.2
ssc-miR-874	NM_001142830.1
ssc-miR-874	NM_001142831.1
ssc-miR-874	NM_001143708.1
ssc-miR-874	NM_001143710.1
ssc-miR-874	NM_001143716.1
ssc-miR-874	NM_001144123.1
ssc-miR-874	NM_001145383.1
ssc-miR-874	NM_001159659.1
ssc-miR-874	NM_001164843.1
ssc-miR-874	NM_001164845.1
ssc-miR-874	NM_001164849.1
ssc-miR-874	NM_001164855.1
ssc-miR-874	NM_001164860.1
ssc-miR-874	NM_001166310.1
ssc-miR-874	NM_001166311.1
ssc-miR-874	NM_001166317.2
ssc-miR-874	NM_001166318.1
ssc-miR-874	NM_001166319.1
ssc-miR-874	NM_001001534.1
ssc-miR-885-5p	NM_001097448.1
ssc-miR-885-5p	NM_001137636.2
ssc-miR-885-5p	NM_001243591.1
ssc-miR-885-5p	NM_213739.1
ssc-miR-885-5p	XM_001926994.4
ssc-miR-885-5p	XM_003121602.6
ssc-miR-885-5p	XM_003127015.4
ssc-miR-885-5p	XM_003356211.4
ssc-miR-885-5p	XM_003483214.4
ssc-miR-885-5p	XM_005657361.2
ssc-miR-885-5p	XM_005661594.3
ssc-miR-885-5p	XM_005665126.3
ssc-miR-885-5p	XM_005665127.3
ssc-miR-885-5p	XM_005665128.3
ssc-miR-885-5p	XM_005671500.3
ssc-miR-885-5p	XM_013978119.2
ssc-miR-885-5p	XM_013999325.2
ssc-miR-885-5p	XM_021064964.1
ssc-miR-885-5p	XM_021066038.1
ssc-miR-885-5p	XM_021070938.1
ssc-miR-885-5p	XM_021070939.1
ssc-miR-885-5p	XM_021070940.1
ssc-miR-885-5p	XM_021073199.1
ssc-miR-885-5p	XM_021075679.1
ssc-miR-885-5p	XM_021078824.1
ssc-miR-885-5p	XM_021079901.1
ssc-miR-885-5p	XM_021079905.1
ssc-miR-885-5p	XM_021081036.1
ssc-miR-885-5p	XM_021084394.1
ssc-miR-885-5p	XM_021088905.1
ssc-miR-885-5p	XM_021092233.1
ssc-miR-885-5p	XM_021092234.1
ssc-miR-885-5p	XM_021093449.1
ssc-miR-885-5p	XM_021093450.1
ssc-miR-885-5p	XM_021093451.1
ssc-miR-885-5p	XM_021094611.1
ssc-miR-885-5p	XM_021095085.1
ssc-miR-885-5p	XM_021095086.1
ssc-miR-885-5p	XM_021095087.1
ssc-miR-885-5p	XM_021095601.1
ssc-miR-885-5p	XM_021095602.1
ssc-miR-885-5p	XM_021095603.1
ssc-miR-885-5p	XM_021095604.1
ssc-miR-885-5p	XM_021095605.1
ssc-miR-885-5p	XM_021095606.1
ssc-miR-885-5p	XM_021095607.1
ssc-miR-885-5p	XM_021095608.1
ssc-miR-9-1	NM_001001635.1
ssc-miR-9-1	NM_001243862.1
ssc-miR-9-1	NM_214307.1
ssc-miR-9-1	XM_003130269.5
ssc-miR-9-1	XM_005653621.3
ssc-miR-9-1	XM_005657047.3
ssc-miR-9-1	XM_005657051.3
ssc-miR-9-1	XM_005657052.2
ssc-miR-9-1	XM_013998506.2
ssc-miR-9-1	XM_013998510.2
ssc-miR-9-1	XM_013998514.2
ssc-miR-9-1	XM_021064495.1
ssc-miR-9-1	XM_021064509.1
ssc-miR-9-1	XM_021064546.1
ssc-miR-9-1	XM_021066087.1
ssc-miR-9-1	XM_021066752.1
ssc-miR-9-1	XM_021088699.1
ssc-miR-9-1	XM_021088702.1
ssc-miR-9-1	XM_021088703.1
ssc-miR-9-1	XM_021088704.1
ssc-miR-9-1	XM_021088705.1
ssc-miR-9-1	XM_021096379.1
ssc-miR-9-1	XM_021097658.1
ssc-miR-9-1	XM_021097675.1
ssc-miR-9-1	XM_021101872.1
ssc-miR-9-1	XM_021101873.1
ssc-miR-9-1	XM_021098657.1
ssc-miR-9-1	XM_003357318.4
ssc-miR-9-1	XM_013982324.2
ssc-miR-9-1	XM_021100433.1
ssc-miR-9841-3p	NM_001098585.1
ssc-miR-9841-3p	NM_001113694.1
ssc-miR-9841-3p	NM_001243793.1
ssc-miR-9841-3p	XM_003355340.4
ssc-miR-9841-3p	XM_005653058.3
ssc-miR-9841-3p	XM_005661498.3
ssc-miR-9841-3p	XM_005672124.3
ssc-miR-9841-3p	XM_005672125.3
ssc-miR-9841-3p	XM_021067113.1
ssc-miR-9841-3p	XM_021070139.1
ssc-miR-9841-3p	XM_021070814.1
ssc-miR-9841-3p	XM_021071276.1
ssc-miR-9841-3p	XM_021074595.1
ssc-miR-9841-3p	XM_021076471.1
ssc-miR-9841-3p	XM_021084455.1
ssc-miR-9841-3p	XM_021084456.1
ssc-miR-9841-3p	XM_021084457.1
ssc-miR-9841-3p	XM_021084458.1
ssc-miR-9841-3p	XM_021084459.1
ssc-miR-9841-3p	XM_021084460.1
ssc-miR-9841-3p	XM_021084461.1
ssc-miR-9841-3p	XM_021086052.1
ssc-miR-9841-3p	XM_021092879.1
ssc-miR-9841-3p	XM_021093122.1
ssc-miR-9841-3p	XM_021099708.1
ssc-miR-9841-3p	XM_021099709.1
ssc-miR-9841-3p	XM_021084603.1
ssc-miR-9841-3p	XM_021072070.1
