# Supplementary material for: Global miRNA, lncRNA, and mRNA Transcriptome Profiling of Endometrial Epithelial Cells Reveals Genes Related to Porcine Reproductive Failure Caused by Porcine Reproductive and Respiratory Syndrome Virus
Source: Front Immunol. 2019 Jun 4;10:1221. doi: 10.3389/fimmu.2019.01221 (PMC6559286; doi:10.3389/fimmu.2019.01221)
Supplement: Supplementary file 6 [file Table_6.csv]

Supplemental Table 6: Differential expressed lncRNAs annotation
Gene_ID	tran_num	tran_ID	tran_exon_num	tran_length	tran_start	tran_end	exon_len	exon_start	chain	chr
106507819	1	XR_001304108.2	5	1114	67084574	67090540	289,70,33,205,517,	6.71E+39	+	NC_010450.4
LXLOC_000876	1	LTCONS_00002692	2	262	182978720	182979099	56,206,	1.83E+17	+	NC_010443.5
LXLOC_003804	1	LTCONS_00010766	1	251	77087440	77087690	251,	77087440	+	NC_010444.4
LXLOC_003975	1	LTCONS_00011216	3	599	102243788	102254278	136,176,287,	1.02E+26	+	NC_010444.4
LXLOC_005451	1	LTCONS_00015205	2	674	94720204	94726038	427,247,	9.47E+15	-	NC_010444.4
LXLOC_005462	1	LTCONS_00015309	1	243	96292467	96292709	243,	96292467	-	NC_010444.4
LXLOC_008905	3	LTCONS_00024941	2	2481	130396948	130406949	814,1667,	1.30E+17	+	NC_010446.5
LXLOC_008905	3	LTCONS_00024942	3	2585	130396948	130406949	814,104,1667,	1.30E+26	+	NC_010446.5
LXLOC_008905	3	LTCONS_00024943	3	1765	130397182	130409566	580,656,529,	1.30E+26	+	NC_010446.5
LXLOC_012599	1	LTCONS_00035134	2	243	85280862	85295168	229,14,	8.53E+15	+	NC_010448.4
LXLOC_013387	1	LTCONS_00037493	3	460	42546198	42559926	171,132,157,	4.25E+23	-	NC_010448.4
LXLOC_015809	1	LTCONS_00044408	1	237	21019323	21019559	237,	21019323	-	NC_010449.5
LXLOC_016441	1	LTCONS_00045988	2	229	78496898	78505204	192,37,	7.85E+15	-	NC_010449.5
LXLOC_016443	1	LTCONS_00045990	1	336	78551523	78551858	336,	78551523	-	NC_010449.5
LXLOC_016574	1	LTCONS_00046218	3	3473	95825487	95831164	3176,104,193,	9.58E+23	-	NC_010449.5
LXLOC_017578	1	LTCONS_00049088	1	234	42349607	42349840	234,	42349607	-	NC_010450.4
LXLOC_017686	1	LTCONS_00049355	1	238	69531520	69531757	238,	69531520	-	NC_010450.4
LXLOC_017707	1	LTCONS_00049422	6	621	71491677	71499678	311,36,48,51,67,108,	7.15E+47	-	NC_010450.4
LXLOC_019679	1	LTCONS_00054977	1	234	92762087	92762320	234,	92762087	-	NC_010451.4
LXLOC_019813	1	LTCONS_00055381	2	215	120488047	120494364	181,34,	1.20E+17	-	NC_010451.4
LXLOC_022628	1	LTCONS_00063176	3	874	23375998	23379417	355,120,399,	2.34E+23	-	NC_010454.4
LXLOC_027120	1	LTCONS_00077278	1	252	137414362	137414613	252,	137414362	-	NC_010456.5
LXLOC_029505	1	LTCONS_00084124	2	1201	51538365	51544081	469,732,	5.15E+15	+	NC_010459.5
LXLOC_032406	1	LTCONS_00091984	1	352	11780	12131	352,	11780	-	NW_018084912.1
