# Supplementary material for: Global miRNA, lncRNA, and mRNA Transcriptome Profiling of Endometrial Epithelial Cells Reveals Genes Related to Porcine Reproductive Failure Caused by Porcine Reproductive and Respiratory Syndrome Virus
Source: Front Immunol. 2019 Jun 4;10:1221. doi: 10.3389/fimmu.2019.01221 (PMC6559286; doi:10.3389/fimmu.2019.01221)
Supplement: Supplementary file 8 [file Table_8.csv]

Supplemental table 8: GO analysis of DELncRNAs
Term	Count	PValue	#NAME?	Genes
positive regulation of hydrolase activity	5	0.000124443	3.905029277	ANKRD27, ODAM, RGS6, PTAFR, CYR61
regulation of hydrolase activity	5	0.001493455	2.825807831	ANKRD27, ODAM, RGS6, PTAFR, CYR61
positive regulation of multicellular organismal process	6	0.001562316	2.806230987	ANKRD27, ANKRD17, RGS6, SNAI1, PTAFR, CYR61
positive regulation of catalytic activity	5	0.001966561	2.706292683	ANKRD27, ODAM, RGS6, PTAFR, CYR61
regulation of multicellular organismal process	7	0.003154368	2.501087626	ANKRD27, ANKRD17, RGS6, GAMT, SNAI1, PTAFR, CYR61
positive regulation of molecular function	5	0.005356762	2.271097654	ANKRD27, ODAM, RGS6, PTAFR, CYR61
positive regulation of GTPase activity	3	0.006701662	2.173817465	ANKRD27, ODAM, RGS6
regulation of developmental process	6	0.007867754	2.104149235	ANKRD27, ANKRD17, RGS6, GAMT, SNAI1, CYR61
response to stress	7	0.010129318	1.994419814	ODAM, ANKRD17, MUM1, SNAI1, PARP2, PTAFR, CYR61
regulation of GTPase activity	3	0.012312687	1.909647154	ANKRD27, ODAM, RGS6
regulation of catalytic activity	5	0.013847902	1.858616015	ANKRD27, ODAM, RGS6, PTAFR, CYR61
regulation of cell differentiation	5	0.018284396	1.737919391	ANKRD27, ANKRD17, RGS6, SNAI1, CYR61
positive regulation of cell differentiation	4	0.018925518	1.722952236	ANKRD27, RGS6, SNAI1, CYR61
nucleobase metabolic process	8	0.020801422	1.681906966	ANKRD17, GAMT, MUM1, SNAI1, PARP2, PTAFR, ZFP493, CYR61
